# Supplementary material
Source: PubMed Central journal article supplement (PMC8014438)
Supplement: AJAE-103-1574-s001.pdf [file AJAE-103-1574-s001.pdf]

**AJAE appendix for Impact of COVID-19 and Nationwide Lockdowns  
on Vegetable Prices: Evidence from Wholesale Markets in China**

**Jianqing Ruan, Qingwen Cai, Songqing Jin**

**February 5, 2021**

The material contained herein is supplementary to the article named in the title and published in  
the *American Journal of Agricultural Economics*.

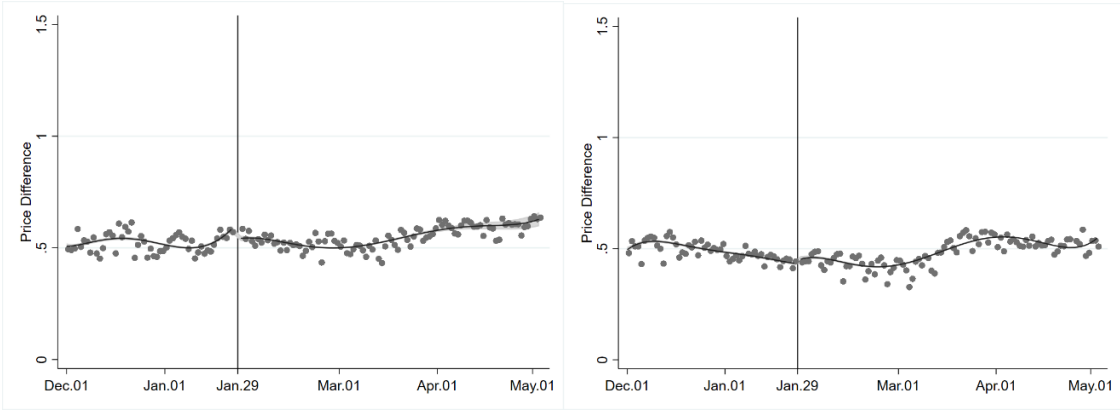

**Figure A1. Falsification test: price difference of 2018 and 2019**

*Notes:* The solid line shows the fit of fourth-order polynomial RD estimation and the shaded areas are the 95 percent confidence intervals.

**Table A1. Impacts (ATEs) of nationwide lockdown on Chinese cabbage price:**

**RD estimates with lagged dependent variable**

|                                                     | (1)                | (2)                 |
|-----------------------------------------------------|--------------------|---------------------|
| <i>After</i>                                        | 0.451***<br>(3.05) | 0.364***<br>(2.91)  |
| <i>Time</i>                                         | 0.0102*<br>(1.91)  | 0.0110***<br>(4.04) |
| <i>After</i> × <i>Time</i>                          | -0.0122<br>(-0.98) | -0.00499<br>(-0.84) |
| <i>LnPrice</i> <sub><i>t-1</i></sub>                | 0.232***<br>(3.18) | 0.473***<br>(7.28)  |
| <i>After</i> × <i>LnPrice</i> <sub><i>t-1</i></sub> | -0.0652<br>(-0.44) | -0.123<br>(-0.98)   |
| <i>LnPrice</i> <sub><i>t-2</i></sub>                |                    | -0.117**<br>(-2.14) |
| <i>After</i> × <i>LnPrice</i> <sub><i>t-2</i></sub> |                    | 0.0277<br>(0.36)    |
| Constant                                            | 0.270***<br>(7.94) | 0.235***<br>(8.54)  |
| Market Fes                                          | Yes                | Yes                 |
| Month Fes                                           | Yes                | Yes                 |

|                  |       |       |
|------------------|-------|-------|
| Market×Month FEs | Yes   | Yes   |
| Effective $N$    | 742   | 980   |
| adj. $R^2$       | 0.929 | 0.935 |

---

*Notes:* This table presents the robustness check using AR(1) and AR(2) estimation to check for autoregression.

Standard errors are clustered at market level and  $t$  statistics are in parentheses. Asterisks indicate the following: \* =  $p$

< 0.1, \*\* =  $p$  < 0.05, and \*\*\* =  $p$  < 0.01.

**Table A2: Alternative falsification tests: Moving the policy timing by three weeks earlier or later**

|                                                | (1)                | (2)                 | (3)                 | (4)                |
|------------------------------------------------|--------------------|---------------------|---------------------|--------------------|
| <b>Panel A: <math>\ln(\text{Price})</math></b> |                    |                     |                     |                    |
| Cut = (3 weeks before)                         | -0.0422<br>(-1.31) | -0.0579<br>(-1.21)  | -0.0720<br>(-1.42)  | -0.0675<br>(-1.19) |
| Cut = (3 weeks after)                          | -0.0148<br>(-0.42) | -0.00488<br>(-0.11) | -0.0509<br>(-0.89)  | -0.0545<br>(-0.81) |
| <b>Panel B: <math>\ln( P_i - P_j )</math></b>  |                    |                     |                     |                    |
| Cut = (3 weeks before)                         | 0.0197<br>(1.05)   | -0.0165<br>(-1.08)  | -0.00923<br>(-0.60) | -0.0140<br>(-0.88) |
| Cut = (3 weeks after)                          | -0.0218<br>(-1.18) | -0.00866<br>(-0.38) | -0.0122<br>(-0.60)  | -0.0101<br>(-0.48) |
| Order of Polynomial                            | 1                  | 2                   | 3                   | 4                  |

*Notes:* Each cell reports the coefficient of *After* from one regression with controls for market FE, month FE, the interaction, and different-order polynomial time trend. The dependent variable of Panel A is  $\ln(\text{Price})$  and that of Panel B is  $\ln(|P_i - P_j|)$ . Standard error is clustered at market level and *t* statistics are in parentheses. Asterisks indicate the following: \* =  $p < 0.1$ , \*\* =  $p < 0.05$ , and \*\*\* =  $p < 0.01$ .

**Table A3. Impacts (ATEs) of nationwide lockdown on price difference:**

**RD estimates with different bandwidth**

|                    | (1)                   | (2)                |
|--------------------|-----------------------|--------------------|
| <b>Panel A</b>     | <b>Conventional</b>   |                    |
|                    | 0.854***              | 0.817***           |
|                    | (16.75)               | (43.34)            |
| <b>Panel B</b>     | <b>Bias-corrected</b> |                    |
|                    | 0.865***              | 0.877***           |
|                    | (16.98)               | (46.49)            |
| <b>Panel C</b>     | <b>Robust</b>         |                    |
|                    | 0.865***              | 0.877***           |
|                    | (10.27)               | (35.24)            |
| Bandwidth          | 0.5×Best Bandwidth    | 1.5×Best Bandwidth |
| <i>N</i>           | 771377                | 771377             |
| Effective <i>N</i> | 115844                | 371621             |

*Notes:* Each cell reports the coefficient of *After* from one regression with controls for market FE, month FE, the interaction, and a fourth-order polynomial time trend. In each panel, the dependent variable is  $\ln(|P_t - P_j|)$  and the results are calculated with different types of standard errors. Columns 1 and 2 respectively choose 0.5 and 1.5 times the best bandwidth in column 4 of Table 1. Standard error is clustered at market level and *t* statistics are in parentheses. Asterisks indicate the following: \* =  $p < 0.1$ , \*\* =  $p < 0.05$ , and \*\*\* =  $p < 0.01$ .

**Table A4. Impacts of nationwide lockdown on price dispersion (RD estimates)**

**Dependent variable:  $P_i/P_j$**

|                                | (1)                   | (2)                  | (3)                  | (4)                     |
|--------------------------------|-----------------------|----------------------|----------------------|-------------------------|
| <i>After</i>                   | 0.139***<br>(5.24)    | 0.125***<br>(2.96)   | 0.102**<br>(1.99)    | 0.103**<br>(2.52)       |
| <i>Time</i>                    | -0.00155<br>(-0.67)   | -0.0138<br>(-1.54)   | -0.00939<br>(-0.55)  | -0.00306<br>(-0.37)     |
| <i>After×Time</i>              | -0.0200***<br>(-3.51) | 0.0149<br>(0.57)     | 0.0324<br>(0.83)     | 0.0188<br>(0.70)        |
| <i>Time</i> <sup>2</sup>       |                       | -0.00209<br>(-1.56)  | -0.00175<br>(-0.40)  | -0.000612<br>(-0.33)    |
| <i>After×Time</i> <sup>2</sup> |                       | -0.000713<br>(-0.19) | -0.00842<br>(-0.87)  | -0.00875<br>(-1.60)     |
| <i>Time</i> <sup>3</sup>       |                       |                      | -0.000101<br>(-0.32) | -0.0000735<br>(-0.47)   |
| <i>After×Time</i> <sup>3</sup> |                       |                      | 0.000818<br>(1.56)   | 0.000991**<br>(2.49)    |
| <i>Time</i> <sup>4</sup>       |                       |                      |                      | -0.00000230<br>(-0.53)  |
| <i>After×Time</i> <sup>4</sup> |                       |                      |                      | -0.0000234**<br>(-2.26) |
| Constant                       | 0.244***<br>(27.09)   | 0.228***<br>(17.06)  | 0.231***<br>(12.82)  | 0.254***<br>(18.67)     |

|                 |       |       |       |        |
|-----------------|-------|-------|-------|--------|
| Market-pair FE  | Yes   | Yes   | Yes   | Yes    |
| Month FE        | Yes   | Yes   | Yes   | Yes    |
| Market×Month FE | Yes   | Yes   | Yes   | Yes    |
| Bandwidth       | 10.18 | 13.48 | 17.74 | 35.31  |
| Number of obs   | 49165 | 58310 | 80082 | 182034 |
| adj. R2         | 0.192 | 0.190 | 0.176 | 0.176  |

---

*Notes:* The best bandwidth is calculated using MSE-optimal bandwidth selector for the RD treatment effect

estimator (MSERD). Standard error is clustered at market level and *t* statistics are in parentheses. Asterisks indicate

the following: \* =  $p < 0.1$ , \*\* =  $p < 0.05$ , and \*\*\* =  $p < 0.01$ .



**Table A5: Time of first-level lockdown**

| <b>Province</b> | <b>Lockdown</b> | <b>Province</b> | <b>Lockdown</b> |
|-----------------|-----------------|-----------------|-----------------|
| Hunan           | 2020/1/23       | Shanxi          | 2020/1/25       |
| Zhejiang        | 2020/1/23       | Neimenggu       | 2020/1/25       |
| Guangdong       | 2020/1/23       | Liaoning        | 2020/1/25       |
| Beijing         | 2020/1/24       | Jilin           | 2020/1/25       |
| Tianjin         | 2020/1/24       | Heilongjiang    | 2020/1/25       |
| Hebei           | 2020/1/24       | Jiangsu         | 2020/1/25       |
| Shanghai        | 2020/1/24       | Henan           | 2020/1/25       |
| Anhui           | 2020/1/24       | Hainan          | 2020/1/25       |
| Fujian          | 2020/1/24       | Shanxi          | 2020/1/25       |
| Jiangxi         | 2020/1/24       | Gansu           | 2020/1/25       |
| Shandong        | 2020/1/24       | Ningxia         | 2020/1/25       |
| Hubei           | 2020/1/24       | Xinjiang        | 2020/1/25       |
| Guangxi         | 2020/1/24       | Qinghai         | 2020/1/26       |
| Chongqing       | 2020/1/24       | Xizang          | 2020/1/29       |
| Sichuan         | 2020/1/24       |                 |                 |
| Guizhou         | 2020/1/24       |                 |                 |
| Yunnan          | 2020/1/24       |                 |                 |
